# Supplementary material
Source: publisher figshare collection journal article supplement (https://gsajournals.figshare.com/ndownloader/files/30689513)
Supplement: Supplementary file 1 [file 30689513]

**LIST OF SUPPLEMENTARY TABLES AND FIGURES**

Table S1. Manual annotation database (excel file)

Table S2. Characteristics of miRNA precursors identified in *Ae. tauschii* (excel file)

Table S3. Function annotation of target gene of miRNAs in *Ae. tauschii* (excel file)

Table S4. Characteristics of phasiRNAs identified in *Ae. tauschii* (excel file)

Table S5. Function annotation of target gene of phasiRNAs in *Ae. tauschii* (excel file)

Figure S1. Size distribution of sRNA reads in Ae. tauschii (word file).

Figure S2. Size distribution of miRNAs, TE- and tRNA-derived sRNAs (word file)

Figure S3. Folding structure of two putative polycistronic miRNAs (word file)
